# Supplementary material for: Polymorphs of LiFeSO4F as cathode materials for lithium ion batteries – a first principle computational study
Source: Royal Society of Chemistry journal article supplement (doi:10.1039/c2cp40489c), 2012-01-01
Supplement: c2cp40489c.pdf [file c2cp40489c.pdf]

## Electronic Supplementary Information

# Polymorphs of $\text{LiFeSO}_4\text{F}$ as Cathode Materials for Lithium Ion Battery – A First Principle Computational Study

Sai Cheong Chung, Prabeer Barpanda, Shin-ichi Nishimura, Yuki Yamada, Atsuo Yamada

Department of Chemical System Engineering,

The University of Tokyo,

7-3-1 Hongou, Bunkyo-Ku, Tokyo

113-5636, JAPAN

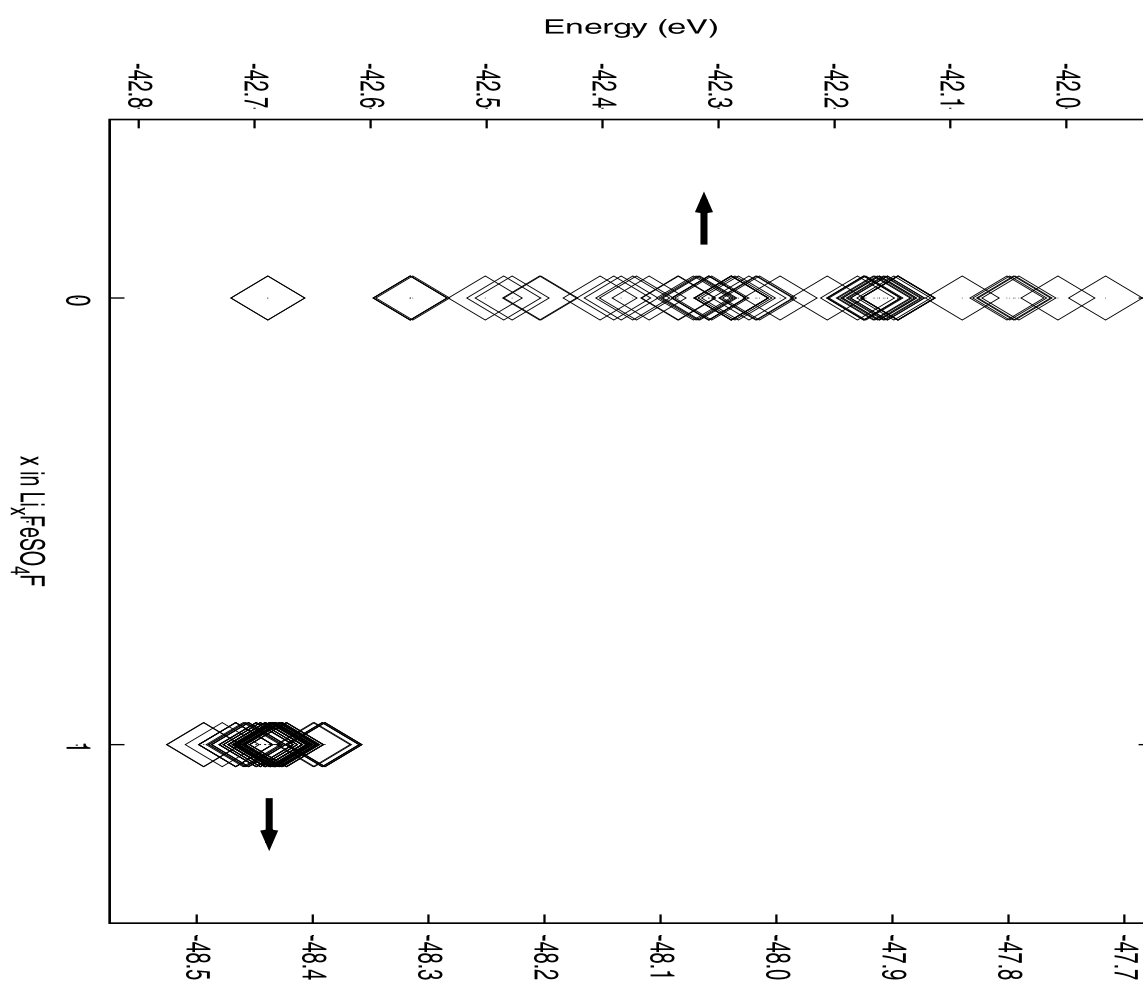

**Figure S1** Energies of the ordered structures for the triplite phase of  $\text{Li}_x\text{FeSO}_4\text{F}$  ( $x=0, 1$ ). There are 70 possible configurations for the permutations of the Fe/Li(vacancy) occupations. Note that the scales for the left and right ordinates are the same.

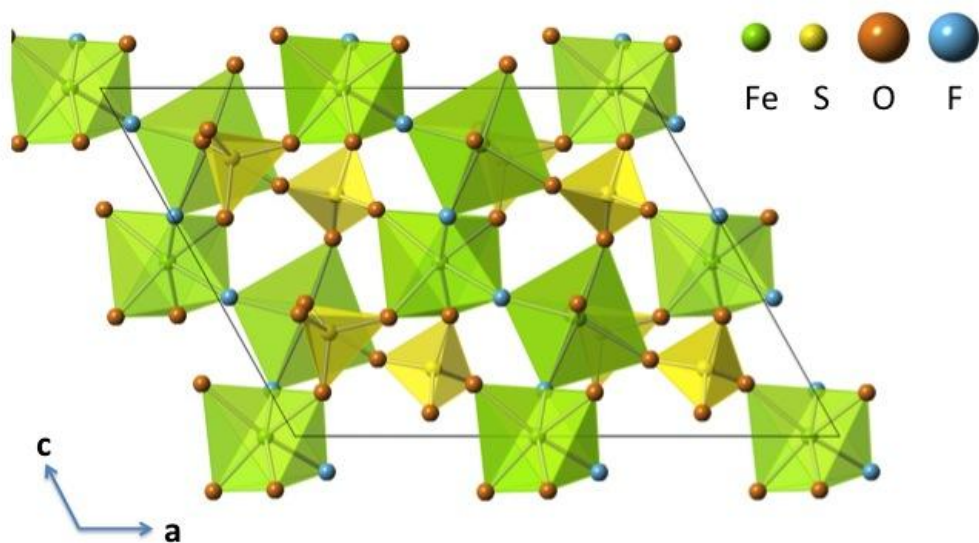

**Figure S2** Optimized structure of the triplite phase of  $\text{FeSO}_4\text{F}$ . This structure corresponds to the lowest energy point for  $x=0$  in **Figure S1**.
